# Supplementary material
Source: publisher figshare collection journal article supplement (https://gsajournals.figshare.com/ndownloader/files/24159224)
Supplement: Supplementary file 1 [file 24159224]

## Sheet: Supplementary Table S1
Supplementary Table S1. Population sizes, parentage, and summary statistics of the SSC data from 2015 and 2016 for blackberry crosses made at the University of Arkansas System Division of Agriculture (UA) and the USDA Horticultural Crops Research Unit (HCRU)
Population	Origin	Female parent	Male parent	No. progeny genotyped with KASP	No. progeny evaluated for SSC 2015	Min SSC 2015	Max SSC 2015	Mean SSC 2015	Std Dev 2015	No. progeny evaluated for SSC 2016	Min SSC 2016	Max SSC 2016	Mean SSC 2016	Std Dev 2016
A-1222	UA	A-2444T	APF-238T	10	11	8.2	13.5	10.9	1.5	29	7.1	13.8	10.1	1.5
A-1229	UA	A-2488	Prime-Ark® 45	12	29	8.8	14.8	11.2	1.4	37	5.4	14.4	10.7	1.6
A-1236	UA	Prime-Ark® Traveler	A-2453T	16	32	6.7	13.8	9.6	1.5	36	4.6	13	8.7	1.8
A-1250	UA	A-2466T	Osage	25	47	5.6	13.9	9.3	1.5	42	6.5	13.6	9.5	1.5
A-1253	UA	A-2487T	A-2418T	15	46	5.5	14.2	9.5	1.7	40	5.9	16.2	10	2.3
A-1261	UA	Galaxy	A-2454T	7	35	5.3	12.7	8.9	1.4	35	6.2	13.7	9.5	1.8
ORUS 4534	HCRU	Hall’s Beauty	ORUS 2635-1	11	19	8.5	15.4	12.8895	1.89763	19	10.1	15.7	12.3579	1.70923
ORUS 4540	HCRU	Galaxy	Prime-Ark® 45	12	16	6	15.3	11.9125	3.01726	20	7.2	16.7	12.5905	2.33857
ORUS 4647	HCRU	ORUS 2532-1	Obsidian	17	23	6.3	15.4	10.8391	2.11375	21	7.1	12	9.15714	1.24241
ORUS 4650	HCRU	ORUS 3172-1	ORUS 2841-1	7	15	9	14.3	11.6533	1.83103	17	7.8	13.9	10.9778	1.66576
ORUS 4651	HCUR	ORUS 3185-3	Onyx	5	14	8.6	16.6	12.1357	2.20091	16	5.8	14.7	11.6588	2.10982
ORUS 4660	HCRU	Columbia Star	Black Diamond	8	19	7.5	20.2	13.821	2.975	19	8.9	16.6	12.1158	1.62182
ORUS 4665	HCRU	Columbia Sunrise	ORUS 2841-1	13	22	9.6	16.3	12.7091	1.60235	23	7.3	15	11.2217	1.98631
ORUS 4674	HCRU	Ouachita	ORUS 3683-1	11	12	10.5	17.6	12.9083	2.08695	17	10.7	18.9	13.3529	1.79726
